# Supplementary material
Source: PubMed Central journal article supplement (PMC9713912)
Supplement: jcsm.10194.sm001.pdf [file jcsm.10194.sm001.pdf]

**Figure S1**—Enrollment flow chart of the multi-center clinical trial included 4 sites.

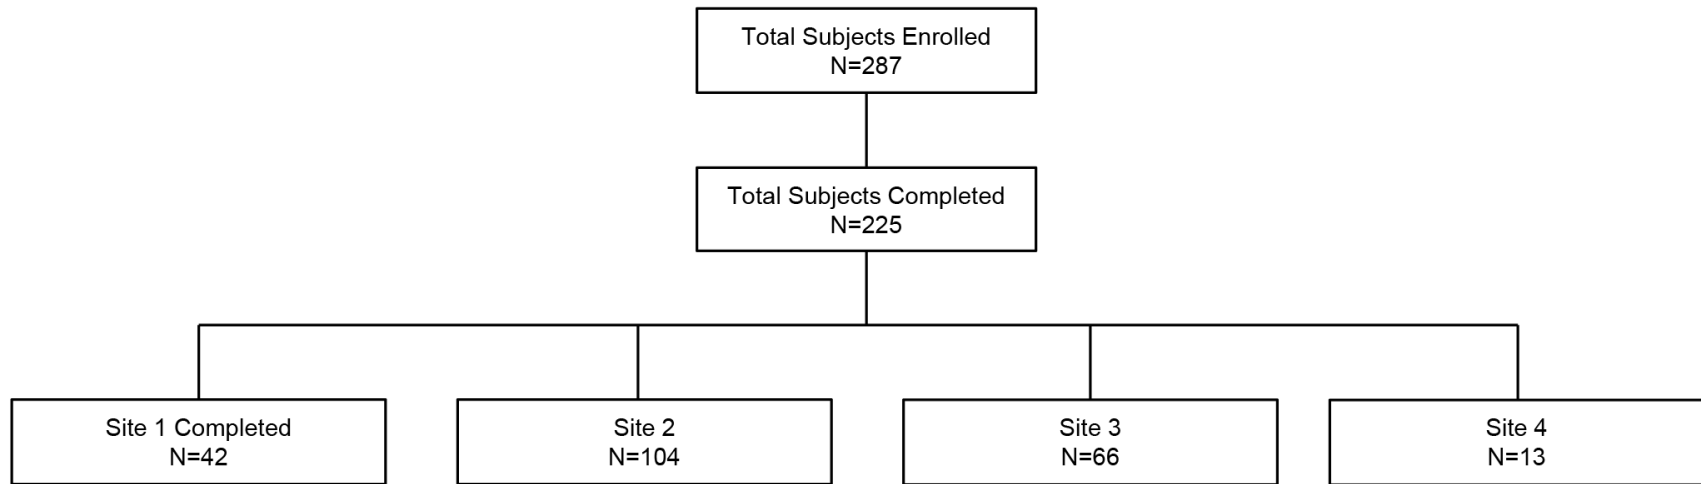

A total of n=287 subjects were enrolled with a total of n=225 included in the final analysis set.
